# Supplementary material for: Cell cycle-dependent cues regulate temporal patterning of the Drosophila central brain neural stem cells
Source: eLife. 2026 Feb 18;14:RP108259. doi: 10.7554/eLife.108259 (PMC12916099; doi:10.7554/eLife.108259)
Supplement: Figure 2—figure supplement 1—source data 1. [file elife-108259-fig2-figsupp1-data1.xlsx]

## Sheet: Sheet1
mCherryRNAi	Cdk1RNAi	pavRNAi
2.44091	3.7439	4.61067
2.95521	3.86213	4.61701
2.62531	3.48855	3.92231
2.60314	3.35564	4.23047
2.58546	3.97373	4.70843
