# Supplementary material for: Cell cycle-dependent cues regulate temporal patterning of the Drosophila central brain neural stem cells
Source: eLife. 2026 Feb 18;14:RP108259. doi: 10.7554/eLife.108259 (PMC12916099; doi:10.7554/eLife.108259)
Supplement: Figure 2—source data 1. [file elife-108259-fig2-data1.xlsx]

## Sheet: Sheet1
Clone Name	IMP+	EcR+	Syp+	n = clones
0h_CDK-1RNAi_Ase_EcR_GFP#1		-
0h_CDK-1RNAi_Ase_EcR_GFP#1		-
0h_CDK-1RNAi_Ase_EcR_GFP#2		-
0h_CDK-1RNAi_Ase_EcR_GFP#3		-
summary		0		n = 4
0h_CDK-1RNAi_Ase_IMP_GFP_Syp#2	1		-
0h_CDK-1RNAi_Ase_IMP_GFP_Syp#2	1		-
0h_CDK-1RNAi_Ase_IMP_GFP_Syp#3	1		-
0h_CDK-1RNAi_Ase_IMP_GFP_Syp#5	1		-
0h_CDK-1RNAi_Ase_IMP_GFP_Syp#6	1		-
0h_CDK-1RNAi_Ase_IMP_GFP_Syp#6	1		-
0h_CDK-1RNAi_Ase_IMP_GFP_Syp#7	1		-
0h_CDK-1RNAi_Ase_IMP_GFP_Syp#9	1		-
0h_CDK-1RNAi_Ase_IMP_GFP_Syp#10	1		-
0h_CDK-1RNAi_Ase_IMP_GFP_Syp#10	1		-
0h_CDK-1RNAi_Ase_IMP_GFP_Syp#10	1		-
summary	11		0	n=11
0h_mCherryRNAi_Asense_EcR_GFP#1		1
0h_mCherryRNAi_Asense_EcR_GFP#2		1
0h_mCherryRNAi_Asense_EcR_GFP#3		1
0h_mCherryRNAi_Asense_EcR_GFP#4		1
0h_mCherryRNAi_Asense_EcR_GFP#4		1
0h_mCherryRNAi_Asense_EcR_GFP#7		1
summary				n = 6
0h_mCherryRNAi_Asense_IMP_GFP_Syp#3	-		1
0h_mCherryRNAi_Asense_IMP_GFP_Syp#3	-		1
0h_mCherryRNAi_Asense_IMP_GFP_Syp#6	-		1
0h_mCherryRNAi_Asense_IMP_GFP_Syp#7	-		1
0h_mCherryRNAi_Asense_IMP_GFP_Syp#7	-		1
summary	0		5	n = 5
0h_PavarottiRNAi_Asense_EcR_GFP#1		-
0h_PavarottiRNAi_Asense_EcR_GFP#2		-
0h_PavarottiRNAi_Asense_EcR_GFP#3		-
0h_PavarottiRNAi_Asense_EcR_GFP#4		-
0h_PavarottiRNAi_Asense_EcR_GFP#5		-
0h_PavarottiRNAi_Asense_EcR_GFP#6		-
0h_PavarottiRNAi_Asense_EcR_GFP#7		-
summary				n = 7
0h_PavarottiRNAi_Asense_IMP_GFP_Syp#1	1		-
0h_PavarottiRNAi_Asense_IMP_GFP_Syp#2	1		-
0h_PavarottiRNAi_Asense_IMP_GFP_Syp#3	1		-
0h_PavarottiRNAi_Asense_IMP_GFP_Syp#3	1		-
0h_PavarottiRNAi_Asense_IMP_GFP_Syp#4	1		-
0h_PavarottiRNAi_Asense_IMP_GFP_Syp#4	1		-
0h_PavarottiRNAi_Asense_IMP_GFP_Syp#5	1		-
0h_PavarottiRNAi_Asense_IMP_GFP_Syp#6	1		-
summary	8		0	n = 8
