# Supplementary material for: Cell cycle-dependent cues regulate temporal patterning of the Drosophila central brain neural stem cells
Source: eLife. 2026 Feb 18;14:RP108259. doi: 10.7554/eLife.108259 (PMC12916099; doi:10.7554/eLife.108259)
Supplement: Figure 3—source data 1. [file elife-108259-fig3-data1.xlsx]

## Sheet: Sheet1
svpLacZ	UAS-Cdk1RNAi;svpLacz
87.5	75
87.5	100
87.5	100
75	75
100	85.7
87.5	85.7
