# Supplementary material for: Cell cycle-dependent cues regulate temporal patterning of the Drosophila central brain neural stem cells
Source: eLife. 2026 Feb 18;14:RP108259. doi: 10.7554/eLife.108259 (PMC12916099; doi:10.7554/eLife.108259)
Supplement: Figure 4—source data 1. [file elife-108259-fig4-data1.xlsx]

## Sheet: Sheet1
Clone Name	IMP+	EcR+	Syp+	n = clones
42h_mCherryRNAi_Asense_EcR_GFP#1.czi		1
42h_mCherryRNAi_Asense_EcR_GFP#3		1
42h_mCherryRNAi_Asense_EcR_GFP#4		1
42h_mCherryRNAi_Asense_EcR_GFP#5		1
42h_mCherryRNAi_Asense_EcR_GFP#6		1
summary		5		n=5
42h_mCherryRNAi_Asense_IMP_GFP_Syp#1	-		1
42h_mCherryRNAi_Asense_IMP_GFP_Syp#2	-		1
42h_mCherryRNAi_Asense_IMP_GFP_Syp#3	-		1
42h_mCherryRNAi_Asense_IMP_GFP_Syp#4	-		1
42h_mCherryRNAi_Asense_IMP_GFP_Syp#4	-		1
summary				n=5
42h_CDK-1RNAi_Ase_EcR_GFP#1		-
42h_CDK-1RNAi_Ase_EcR_GFP#2		-
42h_CDK-1RNAi_Ase_EcR_GFP#3		-
42h_CDK-1RNAi_Ase_EcR_GFP#4		-
summary				n = 1
42h_CDK-1RNAi_Ase_IMP_GFP_Syp#1	1		-
42h_CDK-1RNAi_Ase_IMP_GFP_Syp#2	1		-
42h_CDK-1RNAi_Ase_IMP_GFP_Syp#3	1		-
42h_CDK-1RNAi_Ase_IMP_GFP_Syp#4	1		-
42h_CDK-1RNAi_Ase_IMP_GFP_Syp#4	1		-
summary	5		0	n=5
42h_PavarottiRNAi_Asense_EcR_GFP#1		-
42h_PavarottiRNAi_Asense_EcR_GFP#2		-		n=1
42h_PavarottiRNAi_Asense_EcR_GFP#3		-
42h_PavarottiRNAi_Asense_EcR_GFP#4		-
42h_PavarottiRNAi_Asense_EcR_GFP#5		-
summary		0		n = 5
42h_PavarottiRNAi_Asense_IMP_GFP_Syp#1	1		-
42h_PavarottiRNAi_Asense_IMP_GFP_Syp#2	1		-
42h_PavarottiRNAi_Asense_IMP_GFP_Syp#3	1		-
42h_PavarottiRNAi_Asense_IMP_GFP_Syp#4	1		-
42h_PavarottiRNAi_Asense_IMP_GFP_Syp#5	1		-
summary	5		0	n = 5
