# Supplementary material for: Cell cycle-dependent cues regulate temporal patterning of the Drosophila central brain neural stem cells
Source: eLife. 2026 Feb 18;14:RP108259. doi: 10.7554/eLife.108259 (PMC12916099; doi:10.7554/eLife.108259)
Supplement: Figure 5—source data 1. [file elife-108259-fig5-data1.xlsx]

## Sheet: Sheet1
Clone Name	IMP+	EcR+	Syp+	n = clones / comments
0h_CDK-1RNAi_Ase_EcR_GFP#1		-
0h_CDK-1RNAi_Ase_EcR_GFP#1		-
0h_CDK-1RNAi_Ase_EcR_GFP#2		-
0h_CDK-1RNAi_Ase_EcR_GFP#2		-
0h_CDK-1RNAi_Ase_EcR_GFP#2		-
0h_CDK-1RNAi_Ase_EcR_GFP#3		-
0h_CDK-1RNAi_Ase_EcR_GFP#3		-
0h_CDK-1RNAi_Ase_EcR_GFP#4		-
0h_CDK-1RNAi_Ase_EcR_GFP#4		-
0h_CDK-1RNAi_Ase_EcR_GFP#5		-
0h_CDK-1RNAi_Ase_EcR_GFP#5		-
summary		0		n = 11
0h_CDK-1RNAi_Ase_IMP_GFP_Syp#1	1		-
0h_CDK-1RNAi_Ase_IMP_GFP_Syp#2	1		-
0h_CDK-1RNAi_Ase_IMP_GFP_Syp#4	1		-
0h_CDK-1RNAi_Ase_IMP_GFP_Syp#5	1		-
0h_CDK-1RNAi_Ase_IMP_GFP_Syp#6	1		-
0h_CDK-1RNAi_Ase_IMP_GFP_Syp#7	1		-
0h_CDK-1RNAi_Ase_IMP_GFP_Syp#8	1		-
0h_CDK-1RNAi_Ase_IMP_GFP_Syp#9	1		-
0h_CDK-1RNAi_Ase_IMP_GFP_Syp#10	1		-
0h_CDK-1RNAi_Ase_IMP_GFP_Syp#10	1		-
summary	10			n = 10
0h_mCherryRNAi_Asense_EcR_GFP#1		1
0h_mCherryRNAi_Asense_EcR_GFP#2		1
0h_mCherryRNAi_Asense_EcR_GFP#2		1
0h_mCherryRNAi_Asense_EcR_GFP#3		1
0h_mCherryRNAi_Asense_EcR_GFP#3		1
0h_mCherryRNAi_Asense_EcR_GFP#4		1
0h_mCherryRNAi_Asense_EcR_GFP#5		1
0h_mCherryRNAi_Asense_EcR_GFP#5		1
0h_mCherryRNAi_Asense_EcR_GFP#6		1
0h_mCherryRNAi_Asense_EcR_GFP#7		1
0h_mCherryRNAi_Asense_EcR_GFP#7		1
0h_mCherryRNAi_Asense_EcR_GFP#7		1
summary		12		n = 12
0h_mCherryRNAi_Asense_IMP_GFP_Syp#1	-		1
0h_mCherryRNAi_Asense_IMP_GFP_Syp#2	-		1
0h_mCherryRNAi_Asense_IMP_GFP_Syp#3	-		1
0h_mCherryRNAi_Asense_IMP_GFP_Syp#3	1		-	(mushroom body?)
0h_mCherryRNAi_Asense_IMP_GFP_Syp#4	1		-	(mushroom body?)
0h_mCherryRNAi_Asense_IMP_GFP_Syp#5	-		1
0h_mCherryRNAi_Asense_IMP_GFP_Syp#5	-		1
0h_mCherryRNAi_Asense_IMP_GFP_Syp#5	-		1
0h_mCherryRNAi_Asense_IMP_GFP_Syp#5	-		1
0h_mCherryRNAi_Asense_IMP_GFP_Syp#6	-		1
0h_mCherryRNAi_Asense_IMP_GFP_Syp#6	-		1
0h_mCherryRNAi_Asense_IMP_GFP_Syp#6	-		1
0h_mCherryRNAi_Asense_IMP_GFP_Syp#6	-		1
summary	2		11	n = 13
0h_PavarottiRNAi_Asense_EcR_GFP#1		-		considering negative but stains along the membrane
0h_PavarottiRNAi_Asense_EcR_GFP#2		-		considering negative but stains along the membrane
0h_PavarottiRNAi_Asense_EcR_GFP#3		-		considering negative but stains along the membrane
0h_PavarottiRNAi_Asense_EcR_GFP#4		-		not even in the membrane
0h_PavarottiRNAi_Asense_EcR_GFP#4		-		not even in the membrane
0h_PavarottiRNAi_Asense_EcR_GFP#4		-		not even in the membrane
0h_PavarottiRNAi_Asense_EcR_GFP#7		1		smaller clone
0h_PavarottiRNAi_Asense_EcR_GFP#8		-
0h_PavarottiRNAi_Asense_EcR_GFP#8		-
0h_PavarottiRNAi_Asense_EcR_GFP#8		-
0h_PavarottiRNAi_Asense_EcR_GFP#8		-
summary		1		n = 11
0h_PavarottiRNAi_Asense_IMP_GFP_Syp#1	1		-
0h_PavarottiRNAi_Asense_IMP_GFP_Syp#1	1		-
0h_PavarottiRNAi_Asense_IMP_GFP_Syp#2	1		-
0h_PavarottiRNAi_Asense_IMP_GFP_Syp#3	1		-
0h_PavarottiRNAi_Asense_IMP_GFP_Syp#3	1		-
0h_PavarottiRNAi_Asense_IMP_GFP_Syp#3	1		-
0h_PavarottiRNAi_Asense_IMP_GFP_Syp#4	1		-
0h_PavarottiRNAi_Asense_IMP_GFP_Syp#4	1		-
0h_PavarottiRNAi_Asense_IMP_GFP_Syp#4	1		-
0h_PavarottiRNAi_Asense_IMP_GFP_Syp#5	1		-
0h_PavarottiRNAi_Asense_IMP_GFP_Syp#5	1		-
0h_PavarottiRNAi_Asense_IMP_GFP_Syp#5	1		-
summary	12		0	n = 12
42h_CDK-1RNAi_Ase_EcR_GFP#1		-
42h_CDK-1RNAi_Ase_EcR_GFP#2		-
42h_CDK-1RNAi_Ase_EcR_GFP#2		-
42h_CDK-1RNAi_Ase_EcR_GFP#5		-
42h_CDK-1RNAi_Ase_EcR_GFP#5		-
42h_CDK-1RNAi_Ase_EcR_GFP#5		-
42h_CDK-1RNAi_Ase_EcR_GFP#6		-
42h_CDK-1RNAi_Ase_EcR_GFP#6		-
summary		0		n = 8
42h_CDK-1RNAi_Ase_IMP_GFP_Syp#1	1		-
42h_CDK-1RNAi_Ase_IMP_GFP_Syp#1	1		-
42h_CDK-1RNAi_Ase_IMP_GFP_Syp#2	1		-
42h_CDK-1RNAi_Ase_IMP_GFP_Syp#2	1		-
42h_CDK-1RNAi_Ase_IMP_GFP_Syp#3	1		-
42h_CDK-1RNAi_Ase_IMP_GFP_Syp#4	1		-
42h_CDK-1RNAi_Ase_IMP_GFP_Syp#5	1		-
42h_CDK-1RNAi_Ase_IMP_GFP_Syp#6	1		-
42h_CDK-1RNAi_Ase_IMP_GFP_Syp#6	1		-
42h_CDK-1RNAi_Ase_IMP_GFP_Syp#6	1		-
summary	10		0	n = 10
42h_mCherryRNAi_Asense_EcR_GFP#1		1
42h_mCherryRNAi_Asense_EcR_GFP#1		1
42h_mCherryRNAi_Asense_EcR_GFP#1		1
42h_mCherryRNAi_Asense_EcR_GFP#2		1
42h_mCherryRNAi_Asense_EcR_GFP#2		1
42h_mCherryRNAi_Asense_EcR_GFP#3		1
42h_mCherryRNAi_Asense_EcR_GFP#4		1
42h_mCherryRNAi_Asense_EcR_GFP#4		1
42h_mCherryRNAi_Asense_EcR_GFP#6		1
42h_mCherryRNAi_Asense_EcR_GFP#10		1
summary		10		n= 10
42h_mCherryRNAi_Asense_IMP_GFP_Syp#2	0		1
42h_mCherryRNAi_Asense_IMP_GFP_Syp#3	0		1	NB is hard to see
42h_mCherryRNAi_Asense_IMP_GFP_Syp#4	0		1
42h_mCherryRNAi_Asense_IMP_GFP_Syp#4	0		1
42h_mCherryRNAi_Asense_IMP_GFP_Syp#5	0		1
42h_mCherryRNAi_Asense_IMP_GFP_Syp#5	0		1
42h_mCherryRNAi_Asense_IMP_GFP_Syp#6	0		1
42h_mCherryRNAi_Asense_IMP_GFP_Syp#6	0		1
summary	0		8	n = 8 (there are more clones if needed (#7))
42h_Pavarotti_EcR_GFP		-
42h_Pavarotti_EcR_GFP#2		-
42h_Pavarotti_EcR_GFP#2		-
42h_Pavarotti_EcR_GFP#3		-
42h_Pavarotti_EcR_GFP#3		-
42h_Pavarotti_EcR_GFP#4		-
42h_Pavarotti_EcR_GFP#4		-
42h_Pavarotti_EcR_GFP#5		-
42h_Pavarotti_EcR_GFP#5		-
42h_Pavarotti_EcR_GFP#6		-
42h_Pavarotti_EcR_GFP#6		-
42h_Pavarotti_EcR_GFP#7		-
42h_Pavarotti_EcR_GFP#7		-
summary		0		n = 13
42h_PavarottiRNAi_Ase_IMP_GFP_Syp	1		-
42h_PavarottiRNAi_Ase_IMP_GFP_Syp#2	1		-
42h_PavarottiRNAi_Ase_IMP_GFP_Syp#2	1		-
42h_PavarottiRNAi_Ase_IMP_GFP_Syp#3	1		-
42h_PavarottiRNAi_Ase_IMP_GFP_Syp#3	1		-
42h_PavarottiRNAi_Ase_IMP_GFP_Syp#4	1		-
42h_PavarottiRNAi_Ase_IMP_GFP_Syp#4	1		-
42h_PavarottiRNAi_Ase_IMP_GFP_Syp#5	1		-
42h_PavarottiRNAi_Ase_IMP_GFP_Syp#5	1		-
42h_PavarottiRNAi_Ase_IMP_GFP_Syp#6	1		-
42h_PavarottiRNAi_Ase_IMP_GFP_Syp#6	1		-
42h_PavarottiRNAi_Ase_IMP_GFP_Syp#7	1		-
42h_PavarottiRNAi_Ase_IMP_GFP_Syp#7	1		-
summary	13		0	n = 13
